# Supplementary material
Source: publisher figshare collection journal article supplement (https://tandf.figshare.com/ndownloader/files/30925195)
Supplement: Supplementary file 3 [file 30925195]

Archive with 3 entries (3 files):
- UASA_A_1529594_Supplement/codeForSubmission.zip
- UASA_A_1529594_Supplement/JASA_ACS_author_form_benkeser.pdf
- UASA_A_1529594_Supplement/websupplement.pdf
