# Supplementary material
Source: publisher figshare collection journal article supplement (https://tandf.figshare.com/ndownloader/files/30925195)
Supplement: Supplementary file 5 [file 30925195]

## Installation of survtmle package

A beta version of an R package is currently available on GitHub and can be installed as follows.

```
# need devtools package for github install
library(devtools)

# install from github
# install_github("linktobeadded")

# load library
library(survtmle)
```

The main function in the package is the `survtmle` function, which computes the cumulative incidence for specified failure type(s). See `?survtmle` for more details, including examples using simulated data.

## Mock RV144 analysis

Below, we produce an analysis of the mock RV144 data that are included with the `survtmle` package. See `?rv144` for more description of the data set.

```
# load the data from the package
data(rv144)

# look at the first 6 rows of data
head(rv144)
```

```
##      ftime ftype vax male year04 year05 medRisk highRisk medAge highAge
## 1         6     0   0    1      1      0      1         0     0      0
## 2         6     0   1    1      0      0      1         0     1      0
## 3         6     0   1    1      0      1      1         0     0      0
## 4         6     0   0    0      1      0      0         0     0      1
## 5         3     0   0    0      0      1      0         1     1      0
## 6         6     0   1    1      0      1      1         0     0      1
```

Below we implement code that estimates the cumulative incidence for both matched and mismatched infections in both the vaccine and treatment arms. For computational convenience, we use a simplified Super Learner library relative to the one used in the manuscript. If one desires to use the same library as in the manuscript, those functions are available in the `superlearnerfunctions_rv144.R` file and can be implemented by sourcing the code from that file and uncommenting the `SL.ftime` and `SL.ctime` lines below.

```
# will need package rpart and randomforest
library(rpart)
library(randomForest)

# set a seed because superlearner uses cross validation
set.seed(12345)

# to use simple super learner library, use these lines
SL.lib <- c("SL.glm", "SL.mean", "SL.rpart")
# to use super learner library from paper, use these lines
# SL.lib <- c("SL.glm", "SL.mean", "SL.rpart.caret1", "SL.rf.caret1")

# fit the tmle at the last time point using survtmle
tmle.fit <- survtmle(
  ftime = rv144$ftime,
```

```

ftype = rv144$ftype,
trt = rv144$vax,
t0 = 6, # final timepoint, 3 years post enrollment
adjustVars = rv144[,4:10], # baseline covariates
glm.trt = "1", # empirical estimates of treatment probabilities
SL.ftime = SL.lib,
SL.ctime = SL.lib,
method = "mean", # for iterative mean-based tmle
verbose = FALSE,
returnModels = TRUE # return super learner fits for use with timepoints()
)

# take a look at the output
tmle.fit

```

```

## $est
##           [,1]
## 0 1 0.007150713
## 1 1 0.004356130
## 0 2 0.001371584
## 1 2 0.001871588
##
## $var
##           0 1           1 1           0 2           1 2
## 0 1 9.530630e-07 1.163370e-10 -1.304589e-09 1.261261e-10
## 1 1 1.163370e-10 5.832930e-07 2.708323e-11 -1.146398e-09
## 0 2 -1.304589e-09 2.708323e-11 1.835037e-07 1.173578e-11
## 1 2 1.261261e-10 -1.146398e-09 1.173578e-11 2.550053e-07

```

We can now use a call to the `timepoints` function in the `survtmle` package to obtain estimates at the first five scheduled visits.

```

# call timepoints to estimate incidence at each timepoint
tp.fit <- timepoints(
  object = tmle.fit,
  times = 1:6,
  returnModels = FALSE
)

# check out the results for a single timepoint, e.g. t = 3
tp.fit$t3

```

```

## $est
##           [,1]
## 0 1 0.0036631222
## 1 1 0.0012796087
## 0 2 0.0005103480
## 1 2 0.0007621896
##
## $var
##           0 1           1 1           0 2           1 2
## 0 1 4.605608e-07 5.287881e-11 -2.428045e-10 6.110277e-11
## 1 1 5.287881e-11 1.592924e-07 1.123397e-11 -1.527312e-10
## 0 2 -2.428045e-10 1.123397e-11 6.437163e-08 6.872899e-12
## 1 2 6.110277e-11 -1.527312e-10 6.872899e-12 9.505477e-08

```

```

#' getVE
#'
#' A function that uses output from a survtmle object to compute
#' vaccine efficacy and vaccine sieve effect estimates
#'
#' @param out A {survtmle} object with two types of failure
#' and two treatment types.
#' @param tol Level of incidence below which not to compute VE.
#' If incidence is very small in the placebo arm the asymmetric scale of VE can
#' cause very small values of VE.
#' @return A list of data.frames whose first row is the vaccine efficacy against
#' type 1 endpoints, second row is vaccine efficacy against type 2 endpoints
#' and third row is vaccine sieve effect. In each row the first entry corresponds
#' to the effect estimate, the second and third to the lower and upper confidence
#' limits, and the fourth to the p-value for the Wald test of the
#' relevant hypothesis test ( $VE = 0$  or  $VSE = 1$ ).

getVE <- function(out, tol = 1e-10){
  fnOut <- lapply(out, function(rslt){
    # check for very small values of cumulative incidence
    # that lead to very large/small values of VE
    if(all(rslt$est[1:2] > tol)){
      # ve against type 1 endpoints
      ve1 <- 1 - rslt$est[2]/rslt$est[1]
      # relative risk on the log scale
      log.rr1 <- log(rslt$est[2]/rslt$est[1])
      # gradient used for se computation on log-scale
      a <- matrix(c(-1/rslt$est[1], 1/rslt$est[2]),nrow=2)
      # standard error on the log scale for relative risk
      se.log.rr1 <- sqrt(t(a)%*%rslt$var[1:2,1:2]%*%a)
      # confidence interval
      ve1.low <- 1 - exp(log.rr1 + 1.96*se.log.rr1)
      ve1.high <- 1 - exp(log.rr1 - 1.96*se.log.rr1)
      # two sided p-value
      p1 <- 2*pnorm(-abs(log.rr1/se.log.rr1))
    }else{
      ve1 <- ve1.low <- ve1.high <- p1 <- NA
    }

    if(all(rslt$est[3:4] > tol)){
      # type 2 proceed exactly as above
      ve2 <- 1 - rslt$est[4]/rslt$est[3]
      log.rr2 <- log(rslt$est[4]/rslt$est[3])
      a <- matrix(c(-1/rslt$est[3], 1/rslt$est[4]),nrow=2)
      se.log.rr2 <- sqrt(t(a)%*%rslt$var[(3:4),(3:4)]%*%a)
      ve2.low <- 1 - exp(log.rr2 + 1.96*se.log.rr2)
      ve2.high <- 1 - exp(log.rr2 - 1.96*se.log.rr2)
      p2 <- 2*pnorm(-abs(log.rr2/se.log.rr2))
    }else{
      ve2 <- ve2.low <- ve2.high <- p2 <- NA
    }
  })
}

```

```

}

if(all(rslt$est > tol)){
  # vaccine sieve effect
  sieve <- exp(log.rr2 - log.rr1)
  # on the log scale
  log.sieve <- log.rr2 - log.rr1
  # gradient used to compute standard error on the log scale
  a <- matrix(c(1/rslt$est[1], -1/rslt$est[2],
               -1/rslt$est[3], 1/rslt$est[4]),nrow=4)
  # standard error
  se.log.sieve <- sqrt(t(a)%*%rslt$var%*%a)
  # confidence interval
  sieve.low <- exp(log.sieve -1.96*se.log.sieve)
  sieve.high <- exp(log.sieve +1.96*se.log.sieve)
  # p-value for hypothesis test
  sieve.p <- 2*pnorm(-abs(log.sieve/se.log.sieve))
}else{
  sieve <- sieve.low <- sieve.high <- sieve.p <- NA
}

# return a matrix
tmp <- data.frame(
  rbind(c(ve1, ve1.low, ve1.high, p1),
        c(ve2, ve2.low, ve2.high, p2),
        c(sieve, sieve.low, sieve.high, sieve.p)
  ))
row.names(tmp) <- c("ve1","ve2","vse")
colnames(tmp) <- c("est","ci.low","ci.high","p")
return(tmp)
})
fnOut
}

# get the ve and vse
ve.fit <- getVE(tp.fit)

# look at the results at time 6
ve.fit$t6

```

```

##          est      ci.low  ci.high      p
## ve1  0.3908118  0.05835564 0.6058912 0.02570707
## ve2 -0.3645449 -2.06406882 0.3923169 0.45138282
## vse  2.2399398  0.89274302 5.6201283 0.08574857

```

## Plotting the results

Below is the plot code used to generate the manuscript figures.

```

# figure dimensions -- used to compute appropriate margins
figure.width <- 8
figure.height <- 5.5
# computing appropriate margins

```

```

par(mar=c(4.1,0,0,0))
left.1 <- par()$mai[1]
par(mar=c(4.1,0,0,0))
right.1 <- par()$mai[1]
left.2 <- right.2 <- right.1
bottom.1 <- upper.2 <- right.1
bottom.2 <- upper.1 <- left.1
thisCex <- 1
x <- (figure.width - (left.1 + right.1 + left.2 + right.2))/2
wid <- rep(c(1,(x+left.2+right.2)/(x+left.1+right.1)),2)
x <- (figure.height - (upper.1 + upper.2 + bottom.1 + bottom.2))/2
hei <- c((x+upper.2+bottom.2)/(x+upper.1+bottom.1),1,1,(x+upper.2+bottom.2)/(x+upper.1+bottom.1))

# set up the layout
layout(matrix(c(1,3,2,4),2,2),width=wid)
# make the top row of plots
for(j in 1:2){
  if(j==2){
    par(mar=c(2.1,4.1,4.1,2.1))
    main.tit <- ""
    yl <- ""
  }else if(j==1){
    par(mar=c(2.1,4.1,4.1,2.1))
    main.tit <- ""
    yl <- "Cumulative incidence"
  }
  # get vector of cumulative incidence in vaccine arm
  f0.hat <- unlist(lapply(tp.fit, function(f){
    f$est[(2*j - 1)]
  })))
  # get vector of cumulative incidence in vaccine arm
  f1.hat <- unlist(lapply(tp.fit, function(f){
    f$est[(2*j)]
  })))

  plot(c(0,f0.hat)~I(0:6),cex.lab=1.2,pch="",col=1,
    ylim=c(0,0.010),bty="n",cex=thisCex,
    # ylim=c(0,0.004),
    ylab=yl,
    xaxt="n",xlab="Years since entry",
    main=main.tit)
  segments(x0=0,x1=7, y0=seq(0,0.010,0.002),col="gray90")
  points(c(0,f0.hat)~I(0:6),pch=ifelse(j==2,19,17),col=1,cex=thisCex)
  points(c(0,f1.hat)~I(0:6),pch=ifelse(j==2,1,2),col=1,cex=thisCex)
  axis(side=1, at=seq(0,6,2),label=seq(0,3,1))
  legend(x="topleft",pch=ifelse(rep(j,2)==c(2,2),c(19,1),c(17,2)),col=1,
    bty="n",
    legend=c("Placebo","Vaccine"))
  mtext(side=3,paste0("AA site 169",ifelse(j==1," matched"," mismatched")))
}

#-----
# vaccine efficacy plot

```

```

#-----
# get matrix of vaccine efficacies, first column = matched
veMat <- Reduce("rbind", lapply(ve.fit,function(f){
  f$est[1:2]
}))

par(mar=c(4.1,4.1,2.1,2.1))
yl <- "Vaccine Efficacy"
y.lim <- c(-0.75,1.25)
plot(c(0,veMat[,1])~I(0:6),ylab=yl,col=1,
      xlab="Years since entry",cex.lab=1.2,xaxt="n",bty="n",cex=thisCex,
      ylim=y.lim,pch="")
segments(x0=0,x1=7, y0=seq(-1,1,0.5),col="gray90")
points(veMat[1:6,1]~I(1:6),ylab=yl,col=1,pch=17)
points(veMat[2:6,2]~I(2:6),ylab=yl,col=1,pch=19,lty=2)
axis(side=1, at=seq(0,6,2),label=seq(0,3,1))
legend(x=0,y=1.55,xpd=TRUE, pch=c(17,19),col=1,bty="n",
       legend=c("169 matched","169 mismatched"))

#-----
# sieve effect plot
#-----
# get vector of use
vse <- Reduce("rbind", lapply(ve.fit,function(f){
  f["vse",1:3]
}))

par(mar=c(4.1,4.1,2.1,2.1))
yl <- "Sieve Effect"
y.lim <- c(0,12)

plot(c(0,0,vse[2:6,1])~I(0:6),ylab=yl,col=1,
      xlab="Years since entry",cex.lab=1.2,xaxt="n",bty="n",cex=thisCex,
      ylim=y.lim,pch="")
segments(x0=0,x1=7, y0=seq(0,10,2),col="gray90")
points(vse[2:6,1]~I(2:6),ylab=yl,col=1,pch=19)
axis(side=1, at=seq(0,6,2),label=seq(0,3,1))
abline(h=1,lty=3)
segments(x0=4:6,y0=vse[4:6,2],y1=vse[4:6,3])
arrows(x0=2:3,y0=vse[2:3,2],y1=12,length=0.075)

```

## Mock RTS,S/AS01 analysis

We now produce an analysis of the multiply outputted mock RTS,S/AS01 data that are included with the `survtmle` package. See `?rtss` for further description of the data set.

```

# load the data from the package
data(rtss)

# look at the first 6 rows of data for first data set
head(rtss[[1]])

```

```
##   ftime ftype vaccine ageWeeks weightForAgeZscore sex site1 site2 site3
```

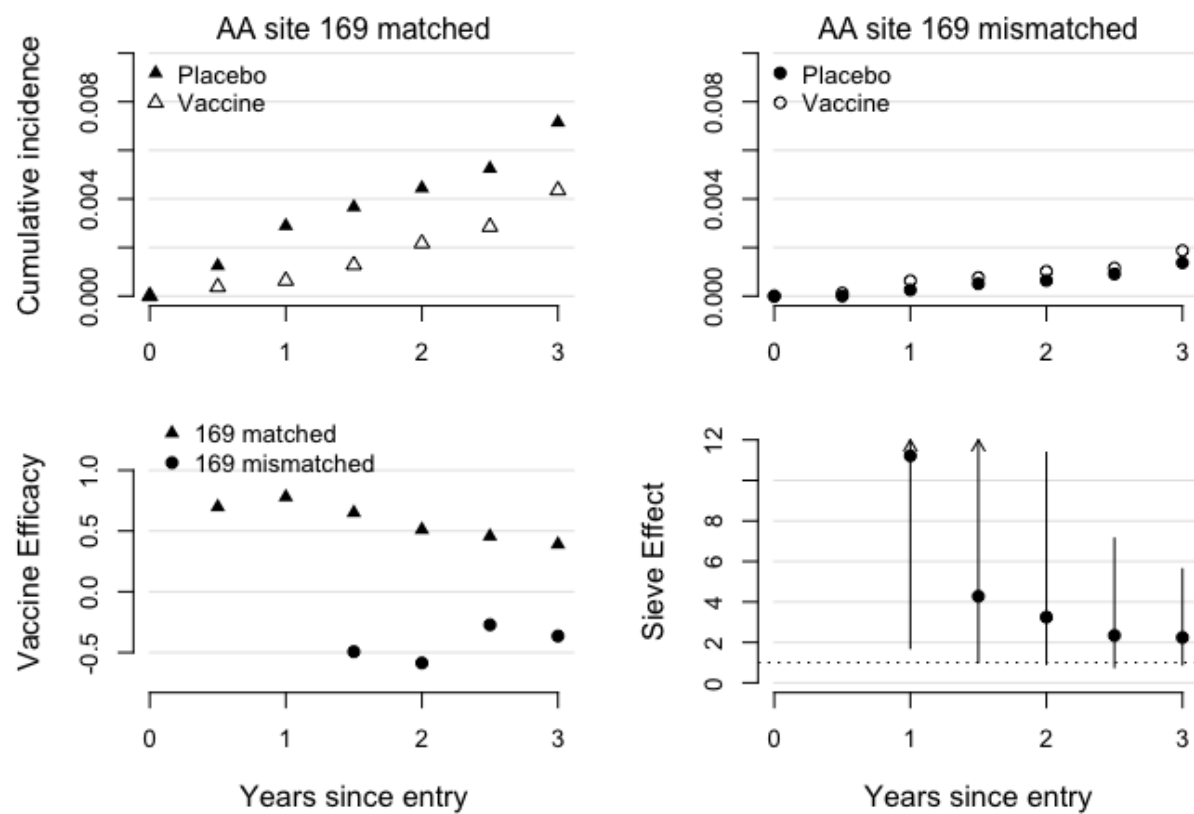

Figure 1:

|      |           |               |                    |                       |                 |   |   |   |   |
|------|-----------|---------------|--------------------|-----------------------|-----------------|---|---|---|---|
| ## 1 | 1         | 2             | 0                  | 24                    | -1.76752196     | 0 | 0 | 0 | 0 |
| ## 2 | 11        | 0             | 0                  | 43                    | -0.15242755     | 1 | 1 | 0 | 0 |
| ## 3 | 12        | 0             | 1                  | 64                    | -1.29467573     | 0 | 0 | 0 | 1 |
| ## 4 | 12        | 0             | 1                  | 45                    | 0.04930793      | 1 | 1 | 0 | 0 |
| ## 5 | 1         | 0             | 1                  | 72                    | -2.14905375     | 1 | 0 | 0 | 1 |
| ## 6 | 12        | 0             | 0                  | 47                    | -1.16692242     | 1 | 0 | 0 | 1 |
| ##   | site4     | site5         | heightForAgeZscore | weightForHeightZscore | armCircumZscore |   |   |   |   |
| ## 1 | 1         | 0             | -0.46929480        | -2.2368340            | -1.5297559      |   |   |   |   |
| ## 2 | 0         | 0             | -0.07157323        | -0.1274793            | -0.2025151      |   |   |   |   |
| ## 3 | 0         | 0             | -1.93292932        | 0.1712379             | -0.7105710      |   |   |   |   |
| ## 4 | 0         | 0             | -0.79276250        | 0.4606719             | 0.5164577       |   |   |   |   |
| ## 5 | 0         | 0             | -3.01736881        | -0.6988993            | -1.6883392      |   |   |   |   |
| ## 6 | 0         | 0             | -1.72782830        | -1.1329046            | -0.9535694      |   |   |   |   |
| ##   | hemog     | distInpatient | distOutpatient     | startMonthCat         |                 |   |   |   |   |
| ## 1 | 9.388641  | 8.8817389     | 3.4446690          | 0                     |                 |   |   |   |   |
| ## 2 | 9.844717  | 13.4724945    | 0.9352634          | 0                     |                 |   |   |   |   |
| ## 3 | 11.159146 | 8.7846917     | 0.4648378          | 0                     |                 |   |   |   |   |
| ## 4 | 12.223923 | 24.6145392    | 4.3018327          | 1                     |                 |   |   |   |   |
| ## 5 | 8.812265  | 12.0307045    | 5.9528733          | 0                     |                 |   |   |   |   |
| ## 6 | 8.963886  | 0.9994255     | 0.9952656          | 0                     |                 |   |   |   |   |

For simplicity, we will focus on implementing the analysis at a single timepoint to illustrate how the multiple outputation procedure works. The `timepoints` function could easily be used to duplicate the analysis across every one month period. As with the RV144 analysis above, we will show code illustrating the method using a simplified Super Learner library. If one desires to use the Super Learner library from the paper, those functions are available in the `superlearnerfunctions_rtss.RData` file.

```
# needed packages
library(rpart)
library(randomForest)
library(gbm)

# set a seed because superlearner uses cross validation
set.seed(12345)

# to use simple super learner library, use these lines
SL.lib <- c("SL.glm", "SL.mean")
# to use super learner library from paper, use these lines
# SL.lib <- list(c("SL.glm", "All"),
#               c("SL.gam", "screen.corRank5"),
#               c("SL.gam", "screen.corRank10"),
#               c("SL.gbm.itMeans", "All"),
#               c("SL.randomForest.itMeans", "All"),
#               c("SL.mean", "All"),
#               c("SL.step.interaction", "screen.corRank5"),
#               c("SL.step.forward", "All"),
#               c("SL.glm", "trtOnlyScreen"),
#               c("SL.glm", "sitezScreen"),
#               c("SL.glm.interaction", "sitezScreen"))

# initialize empty list for results
rtss.rslt <- vector(mode = "list", length = 10)
# fit the tml at time 4 for each of the MD data sets
for(m in 1:10){
```



```

# print messages to indicate progress
if(m==1){
  cat("Estimating time 1")
}else{
  cat(paste0(" ",m))
}

rtss.rslt[[m]] <- survtmle(
  ftime = rtss[[m]]$ftime,
  ftype = rtss[[m]]$ftype,
  trt = rtss[[m]]$vaccine,
  t0 = 4, # four months post-vaccination
  adjustVars = rtss[[m]][,4:ncol(rtss[[m]])], # baseline covariates
  glm.trt = "1", # empirical estimates of treatment probabilities
  SL.ftime = SL.lib,
  SL.ctime = SL.lib,
  method = "mean",
  verbose = FALSE,
  returnModels = FALSE # to save space
)
}

## Estimating time 1 ,2 ,3 ,4 ,5 ,6 ,7 ,8 ,9 ,10
# take a look at the output for first outputed data set
rtss.rslt[[1]]

```

```

## $est
##           [,1]
## 0 1 0.004466103
## 1 1 0.001788243
## 0 2 0.175206417
## 1 2 0.064402672
##
## $var
##           0 1           1 1           0 2           1 2
## 0 1 1.841578e-06 1.004406e-09 -4.863680e-07 3.893243e-08
## 1 1 1.004406e-09 3.826138e-07 4.083446e-08 -3.386951e-08
## 0 2 -4.863680e-07 4.083446e-08 5.252178e-05 1.729760e-06
## 1 2 3.893243e-08 -3.386951e-08 1.729760e-06 1.249981e-05

```

The results can be combined through multiple outputation using the function `getMO`, which is not included in the `survtmle` package, but may be included at a future date.

```

#' getMO
#'
#' A function that performs multiple outputation point estimation and
#' confidence interval calculation.
#'
#' @param rsltList A \code{list} of output from \code{survtmle} at
#' a single timpoint, where each entry in the list corresponds with
#' the results for one outputed data set.
#' @param N The number of rows in the data used to compute the
#' \code{survtmle} output. This is needed for variance calculations.
#' @return A list of \code{data.frames} containing results for the
#' multiply outputed estimates of cumulative incidence, vaccine efficacy,

```

```

#' and vaccine sieve effects and corresponding confidence intervals.
#' The sieve effect output also includes a p-value for the test of equal
#' vaccine efficacy between groups.

```

```

getMO <- function(rsItList,
                  n = 6890){
  M <- length(rsItList)
  # initialize empty result lists
  FVector_Z0_J1 <- FVector_Z1_J1 <- rep(NA,M)
  FVector_Z0_J2 <- FVector_Z1_J2 <- rep(NA,M)
  varLogCumIncRatio_J2 <- varLogCumIncRatio_J1 <- rep(NA,M)
  varVector_Z0_J1 <- varVector_Z1_J1 <- rep(NA,M)
  varVector_Z0_J2 <- varVector_Z1_J2 <- rep(NA,M)
  Dmat_Z0_J1 <- Dmat_Z1_J1 <- matrix(NA,M,n)
  Dmat_Z0_J2 <- Dmat_Z1_J2 <- matrix(NA,M,n)

  ct <- 0
  for(i in 1:M){
    fit <- rsItList[[i]]
    ct <- ct+1
    # vector of estimates
    FVector_Z0_J1[ct] <- fit$est[1]
    FVector_Z1_J1[ct] <- fit$est[2]
    FVector_Z0_J2[ct] <- fit$est[3]
    FVector_Z1_J2[ct] <- fit$est[4]
    # matrix of influence curves
    Dmat_Z0_J1[ct,] <- fit$ic[,1]
    Dmat_Z1_J1[ct,] <- fit$ic[,2]
    Dmat_Z0_J2[ct,] <- fit$ic[,3]
    Dmat_Z1_J2[ct,] <- fit$ic[,4]
  }

  #-----
  # estimates of cumulative inc.
  #-----
  # point estimates
  cumInc_Z0_J1_MO <- mean(FVector_Z0_J1)
  cumInc_Z1_J1_MO <- mean(FVector_Z1_J1)
  cumInc_Z0_J2_MO <- mean(FVector_Z0_J2)
  cumInc_Z1_J2_MO <- mean(FVector_Z1_J2)

  # variance estimates
  a <- rep(1,M)
  varIC_Z0_J1_MO <- varIC_Z1_J1_MO <- 0
  varIC_Z0_J2_MO <- varIC_Z1_J2_MO <- 0
  for(i in 1:n){
    varIC_Z0_J1_MO <- varIC_Z0_J1_MO +
      1/n^2 * tcrossprod(1/M * t(a)%*%Dmat_Z0_J1[,i])
    varIC_Z1_J1_MO <- varIC_Z1_J1_MO +
      1/n^2 * tcrossprod(1/M * t(a)%*%Dmat_Z1_J1[,i])
    varIC_Z0_J2_MO <- varIC_Z0_J2_MO +
      1/n^2 * tcrossprod(1/M * t(a)%*%Dmat_Z0_J2[,i])
    varIC_Z1_J2_MO <- varIC_Z1_J2_MO +

```

```

      1/n^2 * tcrossprod(1/M * t(a)%*%Dmat_Z1_J2[,i])
    }

#-----
# estimates for log cum. inc. ratio
#-----
# point estimates
logCumIncRatio_J1_M0 <- mean(log(FVector_Z1_J1/FVector_Z0_J1))
logCumIncRatio_J2_M0 <- mean(log(FVector_Z1_J2/FVector_Z0_J2))

# variance estimates
a <- rep(1,M)
gMatrix_J1 <- t(cbind(-1/FVector_Z0_J1, 1/FVector_Z1_J1))
gMatrix_J2 <- t(cbind(-1/FVector_Z0_J2, 1/FVector_Z1_J2))

varLogCumIncRatio_J1_M0 <- varLogCumIncRatio_J2_M0 <- 0
for(i in 1:n){
  thisD_J1 <- rbind(Dmat_Z0_J1[,i],Dmat_Z1_J1[,i])
  thisD_J2 <- rbind(Dmat_Z0_J2[,i],Dmat_Z1_J2[,i])
  thisMat1 <- colSums(gMatrix_J1*thisD_J1)
  thisMat2 <- colSums(gMatrix_J2*thisD_J2)
  varLogCumIncRatio_J1_M0 <- varLogCumIncRatio_J1_M0 +
    1/n^2 * tcrossprod(1/M * t(a)%*%thisMat1)
  varLogCumIncRatio_J2_M0 <- varLogCumIncRatio_J2_M0 +
    1/n^2 * tcrossprod(1/M * t(a)%*%thisMat2)
}

#-----
# estimates for sieve effects
#-----
# point estimates
logRatioCumIncRatio_M0 <- mean(
  log(FVector_Z1_J1/FVector_Z0_J1 / (FVector_Z1_J2/FVector_Z0_J2))
)
# variance estimates
a <- rep(1,M)
gMatrix <- t(cbind(
  -1/FVector_Z0_J1,1/FVector_Z1_J1, 1/FVector_Z0_J2,-1/FVector_Z1_J2
))

varLogRatioCumIncRatio_M0 <- 0
for(i in 1:n){
  thisD <- rbind(Dmat_Z0_J1[,i],Dmat_Z1_J1[,i],
    Dmat_Z0_J2[,i],Dmat_Z1_J2[,i])
  thisMat <- colSums(gMatrix*thisD)
  varLogRatioCumIncRatio_M0 <- varLogRatioCumIncRatio_M0 +
    1/n^2 * tcrossprod(1/M * t(a)%*%thisMat)
}

#-----
# format results
#-----
out <- vector(mode="list",length=OL)

```

```

out$cumInc <- data.frame(Z=c(0,1,0,1),J=c(1,1,2,2),
                        cumInc=c(cumInc_Z0_J1_M0,
                                cumInc_Z1_J1_M0,
                                cumInc_Z0_J2_M0,
                                cumInc_Z1_J2_M0))

out$ve <- data.frame(
  J=c(1,2),
  ve=c(1-exp(logCumIncRatio_J1_M0),
        1-exp(logCumIncRatio_J2_M0)),
  ve.low=c(1 - exp(logCumIncRatio_J1_M0 +
                    1.96*sqrt(varLogCumIncRatio_J1_M0)),
            1 - exp(logCumIncRatio_J2_M0 +
                    1.96*sqrt(varLogCumIncRatio_J2_M0))),
  ve.high=c(1 - exp(logCumIncRatio_J1_M0 -
                    1.96*sqrt(varLogCumIncRatio_J1_M0)),
             1 - exp(logCumIncRatio_J2_M0 -
                    1.96*sqrt(varLogCumIncRatio_J2_M0)))
)

out$sieve <- data.frame(
  ratio=exp(logRatioCumIncRatio_M0),
  ratio.low=exp(logRatioCumIncRatio_M0 -
                1.96*sqrt(varLogRatioCumIncRatio_M0)),
  ratio.high=exp(logRatioCumIncRatio_M0 +
                 1.96*sqrt(varLogRatioCumIncRatio_M0)),
  p=2*pnorm(-abs(logRatioCumIncRatio_M0/
                 sqrt(varLogRatioCumIncRatio_M0)))
)

return(out)
}

```

We can use this function to obtain results on the simulated RTS,S/AS01 data.

```

# perform MO over the 10 simulated data sets
mo.rslt <- getMO(rsltList = rtss.rslt, n = 6890)
# look at the results
mo.rslt

```

```

## $cumInc
##   Z J      cumInc
## 1 0 1 0.003876734
## 2 1 1 0.001698182
## 3 0 2 0.175831921
## 4 1 2 0.064477332
##
## $ve
##   J      ve      ve.low  ve.high
## 1 1 0.5681688 0.06890686 0.7997212
## 2 2 0.6333053 0.58267555 0.6777926
##
## $sieve
##   ratio ratio.low ratio.high      p

```

## 1 1.177631 0.5426132 2.555809 0.6791799
